# Supplementary material for: Boosting alkaline hydrogen evolution via cobalt functionalization of organic–inorganic hybrid germanoniobate electrocatalysts
Source: Royal Society of Chemistry journal article supplement (doi:10.1039/d5ce00954e), 2025-11-24
Supplement: d5ce00954e1.pdf [file d5ce00954e1.pdf]

**Supporting information**

**Boosting alkaline hydrogen evolution *via* cobalt functionalization of  
organic-inorganic hybrid germanoniobate electrocatalysts**

Xin-Rong Jin, Jin-Yang Li, Yong-Jiang Wang, Yan-Qiong Sun\*, Xin-Xiong Li and  
Shou-Tian Zheng \*

**CONTENTS**

|                           |    |
|---------------------------|----|
| Experimental section..... | 2  |
| Additional Tables.....    | 3  |
| Additional Figures.....   | 6  |
| References.....           | 14 |

# 1 Section S1 Experimental Procedures

## 1.1 Electrochemical characterization:

Electrochemical measurements were conducted using the Zennium-pro electrochemical workstation (Germany Zahner Instrument) in a standard three-electrode system. All electrochemical tests were performed at room temperature. The Hg/HgO electrode, graphite rod, and POM-modified carbon cloth were used as the reference electrode, counter electrode, and working electrode, respectively. To prepare the working electrode, 5 mg of catalyst was dispersed in a mixed solution containing 30  $\mu\text{L}$  of Nafion solution (10%, DuPont, Wilmington, Delaware, USA), and 300  $\mu\text{L}$  of water/isopropanol (v/v = 1:1) mixture. Then, the suspension was ultrasonicated for 30 minutes to form a homogeneous ink. The carbon cloth (CC) was first degreased by sonication in acetone, then carefully washed with 0.5 M HCl in an ultrasonic bath for 20 min to remove the surface oxidation layer. Finally, 66  $\mu\text{L}$  of catalyst ink was applied in a uniform drop onto a CC, achieving a controlled catalyst loading of 5  $\text{mg cm}^{-2}$ .

In this study, the HER catalytic reaction was conducted in a 1 M KOH solution (pH = 13.9, 25 °C). All potentials mentioned in this study were calibrated using a reversible hydrogen electrode (RHE) as the reference, with the calibration equation:  $E_{\text{RHE}} = E_{\text{Hg/HgO}} + 0.098 + 0.0591 \times \text{pH}$ . In particular, the cyclic voltammetry (CV) tests were first performed at a scan rate of 100  $\text{mV s}^{-1}$  for 20 cycles to attain a stable state. Then, linear sweep voltammetry (LSV) curves of HER were recorded at a scan rate of 10  $\text{mV s}^{-1}$  over a potential range of  $-0.9$  to  $-2$  V. The Tafel plots were graphed using the Tafel equation,  $\eta = b (\log |j|) + a$ , in which  $b$  is the Tafel slope, and  $j$  is the current density. For evaluating the electrochemically active surface area (ECSA), CV was performed between  $-0.8$  and  $-0.9$  V at scan rates from 20 to 100  $\text{mV s}^{-1}$ . The Cdl values were estimated by plotting  $\Delta j = (j_a - j_c) \times 0.5$ , where  $j_a$  and  $j_c$  are the anode and cathode current densities, respectively. The EIS measurements were performed with an open-circuit potential using an AC voltage of 5 mV amplitude and a frequency range of 0.01 kHz to 100 kHz. In the end, the electrode stability was tested using the chronopotentiometry method at 10  $\text{mA cm}^{-2}$ .

## Section 2 Additional tables

**Table S1** Crystal data and structure refinement parameters for  $\{\text{Co}_9(\text{Ge}_4\text{Nb}_{16})_2\}$  and  $\{\text{Ge}_4\text{Nb}_{16}\}$  compounds

| compound                                   | $\{\text{Co}_9(\text{Ge}_4\text{Nb}_{16})_2\}$                                                          | $\{\text{Ge}_4\text{Nb}_{16}\}$                                                            |
|--------------------------------------------|---------------------------------------------------------------------------------------------------------|--------------------------------------------------------------------------------------------|
| Empirical formula                          | $\text{C}_{40}\text{H}_{172}\text{Co}_9\text{Ge}_8\text{N}_{40}\text{Na}_2\text{Nb}_{32}\text{O}_{138}$ | $\text{C}_{10}\text{H}_{49}\text{Ge}_4\text{N}_{10}\text{Na}_4\text{Nb}_{16}\text{O}_{71}$ |
| Formula weight                             | 7552.3                                                                                                  | 3314.55                                                                                    |
| Crystal system                             | triclinic                                                                                               | triclinic                                                                                  |
| Space group                                | $P-1$                                                                                                   | $P-1$                                                                                      |
| $a$ (Å)                                    | 15.0280(7)                                                                                              | 13.8461(9)                                                                                 |
| $b$ (Å)                                    | 17.2493(8)                                                                                              | 14.2158(10)                                                                                |
| $c$ (Å)                                    | 23.3720(12)                                                                                             | 21.6549(15)                                                                                |
| $\alpha$ (°)                               | 92.648(2)                                                                                               | 90.428(2)                                                                                  |
| $\beta$ (°)                                | 99.053(2)                                                                                               | 99.138(2)                                                                                  |
| $\gamma$ (°)                               | 114.473(2)                                                                                              | 98.546(2)                                                                                  |
| $V$ (Å <sup>3</sup> )                      | 5403.6(5)                                                                                               | 4159.5(5)                                                                                  |
| $Z$                                        | 1                                                                                                       | 2                                                                                          |
| $\rho_{\text{calc}}$ (g cm <sup>-3</sup> ) | 2.268                                                                                                   | 2.620                                                                                      |
| $\mu$ (mm <sup>-1</sup> )                  | 3.488                                                                                                   | 3.669                                                                                      |
| $F$ (000)                                  | 3458.0                                                                                                  | 3150.0                                                                                     |
| Temperature/K                              | 170.0                                                                                                   | 170.0                                                                                      |
| Reflections collected                      | 93994                                                                                                   | 119674                                                                                     |
| $R(\text{int})$                            | 0.0490                                                                                                  | 0.0354                                                                                     |
| completeness                               | 99.2%                                                                                                   | 99.9%                                                                                      |
| Index ranges                               | $-17 \leq h \leq 17,$<br>$-20 \leq k \leq 20,$<br>$-27 \leq l \leq 27$                                  | $-16 \leq h \leq 16,$<br>$-16 \leq k \leq 16,$<br>$-25 \leq l \leq 25$                     |
| Data / restraints / parameters             | 19087/48/1226                                                                                           | 14711/66/1059                                                                              |
| GOF on $F^2$                               | 1.029                                                                                                   | 1.027                                                                                      |
| $R_1$ [ $I > 2\sigma$ ]                    | $R_1 = 0.0359, wR_2 = 0.0940$                                                                           | $R_1 = 0.0330, wR_2 = 0.0815$                                                              |
| $R_1$ (all data)                           | $R_1 = 0.0426, wR_2 = 0.0984$                                                                           | $R_1 = 0.0377, wR_2 = 0.0838$                                                              |

$$R_1 = \sum ||F_o| - |F_c|| / \sum |F_o|. \quad wR_2 = [\sum w(F_o^2 - F_c^2)^2 / \sum w(F_o^2)^2]^{1/2}; \quad w = 1 / [\sigma^2(F_o^2) + (xP)^2 + yP], \quad P = (F_o^2 + 2F_c^2) / 3$$

**Table S2.** The bond valence sum calculations of the Nb, Ge and Co atoms in  $\{\text{Co}_9(\text{Ge}_4\text{Nb}_{16})_2\}$ 

| Atoms code | Bond Value | Valence state | Atoms code | Bond Value | Valence state |
|------------|------------|---------------|------------|------------|---------------|
| Nb1        | 5.01155    | +5            | Nb14       | 5.09401    | +5            |
| Nb2        | 5.06434    | +5            | Nb15       | 4.94703    | +5            |
| Nb3        | 5.04083    | +5            | Nb16       | 5.06028    | +5            |
| Nb4        | 5.12453    | +5            | Ge1        | 3.94674    | +4            |
| Nb5        | 4.96480    | +5            | Ge2        | 4.01125    | +4            |
| Nb6        | 5.07113    | +5            | Ge3        | 4.00384    | +4            |
| Nb7        | 5.00913    | +5            | Ge4        | 4.01029    | +4            |
| Nb8        | 5.11181    | +5            | Co1        | 2.85217    | +3            |
| Nb9        | 5.12308    | +5            | Co2        | 2.49251    | +3            |
| Nb10       | 5.06443    | +5            | Co3        | 2.47188    | +3            |
| Nb11       | 4.95253    | +5            | Co4        | 2.48255    | +3            |
| Nb12       | 5.05190    | +5            | Co5        | 1.82962    | +2            |
| Nb13       | 5.05084    | +5            |            |            |               |

**Table S3.** The bond valence sum calculations of the Nb and Ge atoms in  $\{\text{Ge}_4\text{Nb}_{16}\}$ 

| Atoms code | Bond Value | Valence state | Atoms code | Bond Value | Valence state |
|------------|------------|---------------|------------|------------|---------------|
| Nb1        | 5.05677    | +5            | Nb11       | 5.05935    | +5            |
| Nb2        | 5.04123    | +5            | Nb12       | 5.07895    | +5            |
| Nb3        | 5.03584    | +5            | Nb13       | 5.00823    | +5            |
| Nb4        | 5.00827    | +5            | Nb14       | 5.01777    | +5            |
| Nb5        | 5.00694    | +5            | Nb15       | 5.01543    | +5            |
| Nb6        | 5.05374    | +5            | Nb16       | 5.00096    | +5            |
| Nb7        | 5.01238    | +5            | Ge1        | 4.03916    | +4            |
| Nb8        | 5.03703    | +5            | Ge2        | 4.01041    | +4            |
| Nb9        | 5.10303    | +5            | Ge3        | 3.98450    | +4            |
| Nb10       | 5.00883    | +5            | Ge4        | 4.02260    | +4            |

**Table S4. Comparison of HER catalytic activity with the reported systems**

| <b>Samples</b>                                                       | <b>Electrolyte</b> | <b>Overpotential<br/>(mV)@10 mA·cm<sup>-2</sup></b> | <b>Ref.</b>      |
|----------------------------------------------------------------------|--------------------|-----------------------------------------------------|------------------|
| Co/Mo-rGO                                                            | 1.0 M KOH          | 488 mV@10                                           | [1]              |
| CoP-2ph-CMP-800                                                      | 1.0 M KOH          | 360 mV@10                                           | [2]              |
| V <sub>3</sub> Nb <sub>12</sub>                                      | 0.1 M KOH          | 258 mV@10                                           | [3]              |
| Co-P-300                                                             | 1.0 M KOH          | 280mV@10                                            | [4]              |
| Co/CoP-NC                                                            | 1.0 M KOH          | 260 mV@10                                           | [5]              |
| Co <sub>0.85</sub> Se                                                | 1M KOH             | 288 mV@10                                           | [6]              |
| 4N6Co-MoS <sub>2</sub>                                               | 0.1M KOH           | 307 mV@10                                           | [7]              |
| Co/NGC-3                                                             | 0.1 M KOH          | 293 mV@10                                           | [8]              |
| Co(S <sub>0.46</sub> Se <sub>0.54</sub> ) <sub>2</sub> @C            | 1M KOH             | 251 mV@10                                           | [9]              |
| Co-NC                                                                | 1M KOH             | 242 mV@10                                           | [10]             |
| <b>{Co<sub>9</sub>(Ge<sub>4</sub>Nb<sub>16</sub>)<sub>2</sub>}</b>   | <b>1M KOH</b>      | <b>240 mV@10</b>                                    | <b>This work</b> |
| (Fe <sub>0.75</sub> Co <sub>0.25</sub> ) <sub>5</sub> C <sub>2</sub> | 1.0 M KOH          | 174 mV@10                                           | [11]             |
| Co <sub>3</sub> -Ti <sub>2</sub> Nb <sub>8</sub>                     | 1.0 M KOH          | 172 mV@10                                           | [12]             |
| Co <sub>3</sub> O <sub>4</sub> @MoO <sub>3</sub>                     | 1.0 M KOH          | 158 mV@10                                           | [13]             |

## Section 3 Additional Figures

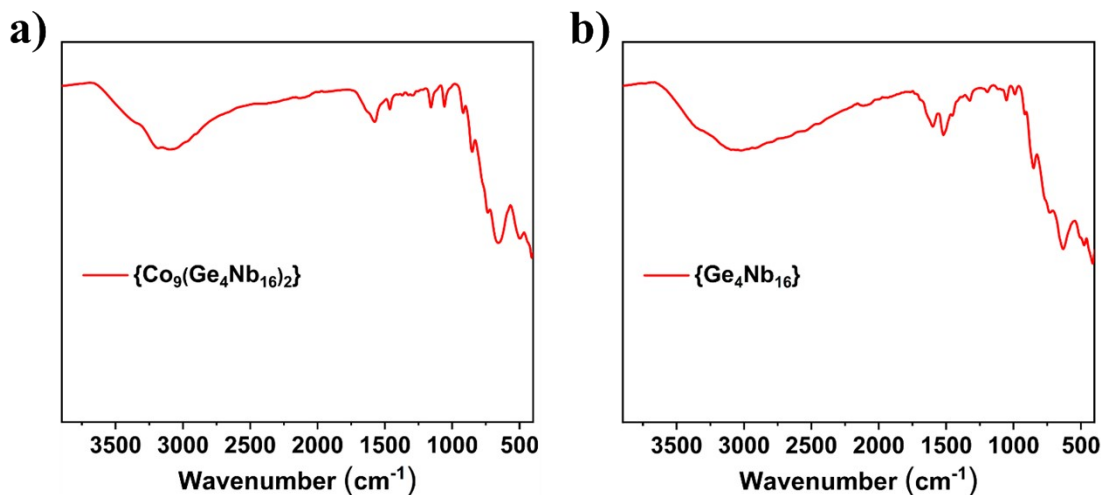

Fig. S1 IR spectra of  $\{\text{Co}_9(\text{Ge}_4\text{Nb}_{16})_2\}$  (a) and  $\{\text{Ge}_4\text{Nb}_{16}\}$  (b).

As shown in Fig. S1a, for  $\{\text{Co}_9(\text{Ge}_4\text{Nb}_{16})_2\}$ , the broad peak centered at  $3203\text{ cm}^{-1}$  corresponds to the  $\nu(\text{O-H})$  stretching vibration of the water molecules, while peaks at  $1575\text{ cm}^{-1}$  are assigned to the  $\delta(\text{H-O-H})$  bending vibration. Peaks at  $3096\text{ cm}^{-1}$  are attributed to the  $\nu(\text{C-H})$  and  $\nu(\text{N-H})$  stretching vibrations, while the peaks at  $1463\text{ cm}^{-1}$  are ascribed to the  $\delta(\text{N-H})$  and  $\delta(\text{C-H})$  bending vibrations. Peaks at  $1158\text{ cm}^{-1}$  and  $1058\text{ cm}^{-1}$  mainly correspond to the  $\nu(\text{C-N})$ . The characteristic peaks of Nb-O bonds appear in the range of  $1000\text{--}600\text{ cm}^{-1}$ . The peak at  $918\text{ cm}^{-1}$  and  $851\text{ cm}^{-1}$  is attributed to the  $\nu(\text{Nb=O}_t)$  stretching vibration. Peaks at  $658\text{ cm}^{-1}$  correspond to the  $\nu(\text{Nb-O}_b\text{-Nb})$  bending vibration. The peak at  $507\text{ cm}^{-1}$  is attributed to the  $\nu(\text{Co-O})$ .

As shown in Fig. S1b, for  $\{\text{Ge}_4\text{Nb}_{16}\}$ , peaks at  $3340\text{ cm}^{-1}$  and  $3024\text{ cm}^{-1}$  are ascribed to the  $\nu(\text{O-H})$  and  $\nu(\text{N-H})$ , while peaks at  $1598\text{ cm}^{-1}$  are assigned to the  $\delta(\text{H-O-H})$  bending vibration, while the peaks at  $1520\text{ cm}^{-1}$  ascribe to the  $\delta(\text{N-H})$  and  $\delta(\text{C-H})$  bending vibrations, Peaks at  $1052\text{ cm}^{-1}$  mainly ascribe to the  $\nu(\text{C-N})$ . The peak at  $989\text{ cm}^{-1}$  and  $851\text{ cm}^{-1}$  is attributed to the  $\nu(\text{Nb=O}_t)$  stretching vibration. Peaks at  $631\text{ cm}^{-1}$ ,  $475\text{ cm}^{-1}$  and  $416\text{ cm}^{-1}$  correspond to the  $\nu(\text{Nb-O}_b\text{-Nb})$  bending vibration.

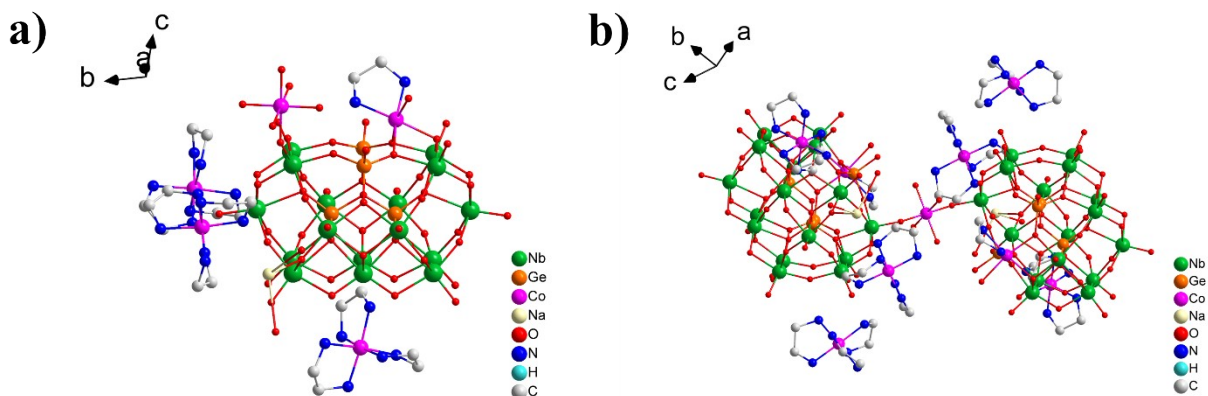

Fig. S2 (a) Asymmetric unit of  $\{\text{Co}_9(\text{Ge}_4\text{Nb}_{16})_2\}$ ; (b) Molecular structure of  $\{\text{Co}_9(\text{Ge}_4\text{Nb}_{16})_2\}$ .

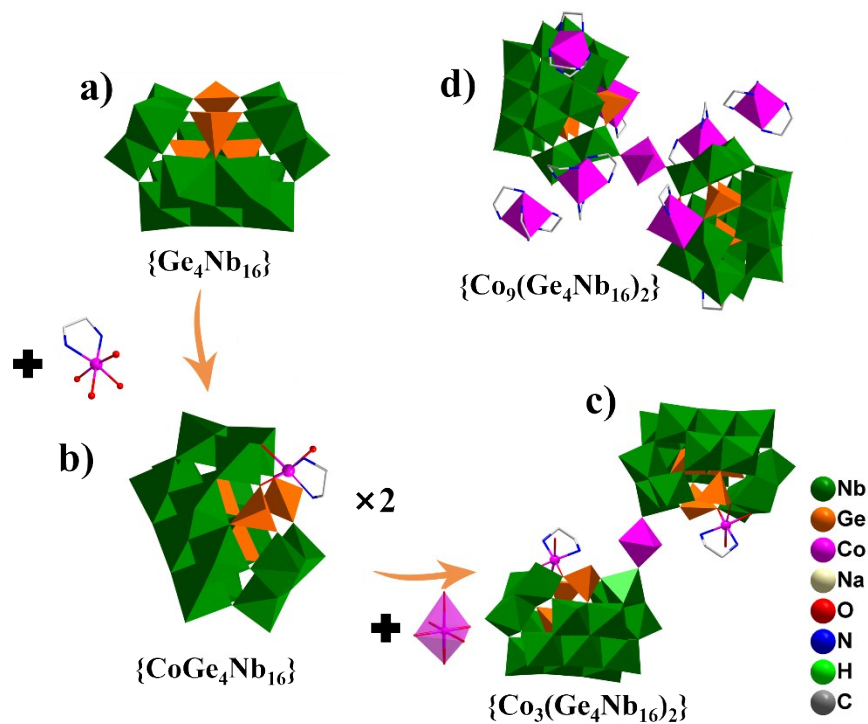

Fig. S3 Schematic view of the structure of  $\{\text{Co}_9(\text{Ge}_4\text{Nb}_{16})_2\}$ .

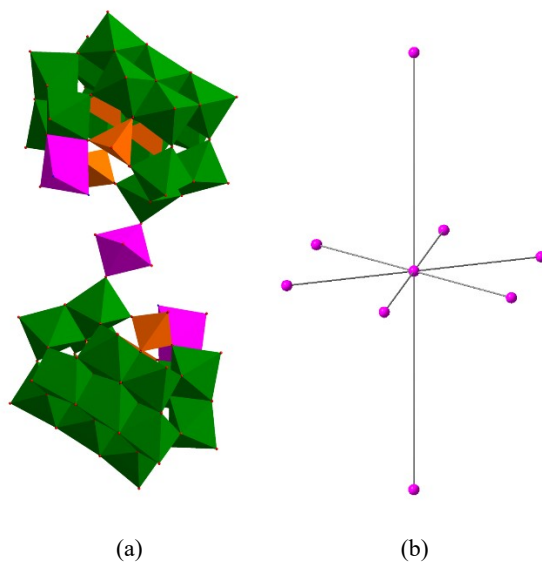

Fig. S4 (a) View of the  $\{\text{Co}_3(\text{Ge}_4\text{Nb}_{16})_2\}$  cluster which links eight adjacent  $\{\text{Co}_3(\text{Ge}_4\text{Nb}_{16})_2\}$  clusters via six bridged  $[\text{Co}(\text{en})_3]^{3+}$  units; (b) simplified uninodal 8-connected node in  $\{\text{Co}_9(\text{Ge}_4\text{Nb}_{16})_2\}$ . Color code:  $\text{NbO}_6$  octahedron, green;  $\text{GeO}_4$  tetrahedron, orange;  $\text{CoO}_6$  octahedron, purple.

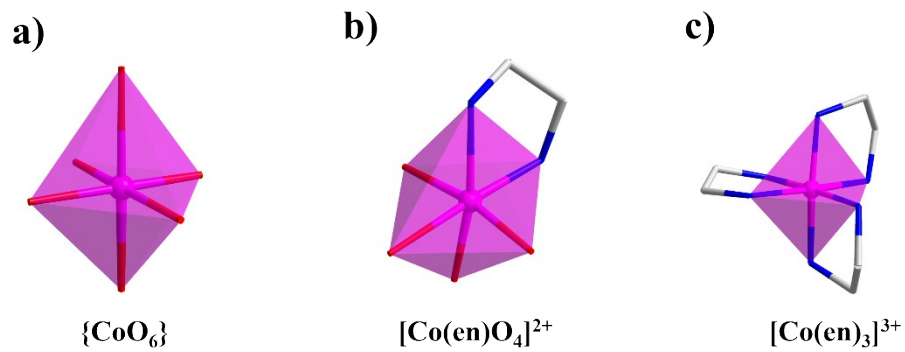

**Fig. S5** Coordination environments of cobalt ions (a)  $\{\text{CoO}_6\}$ ; (b)  $[\text{Co}(\text{en})\text{O}_4]^{2+}$ ; (c)  $[\text{Co}(\text{en})_3]^{3+}$ .

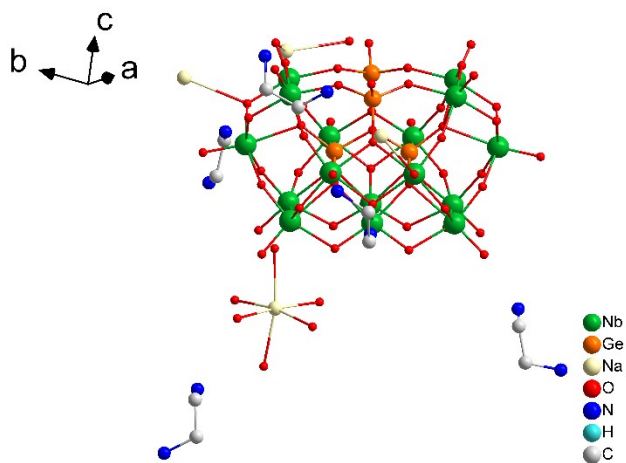

**Fig. S6** View of the asymmetric unit of  $\{\text{Ge}_4\text{Nb}_{16}\}$ .

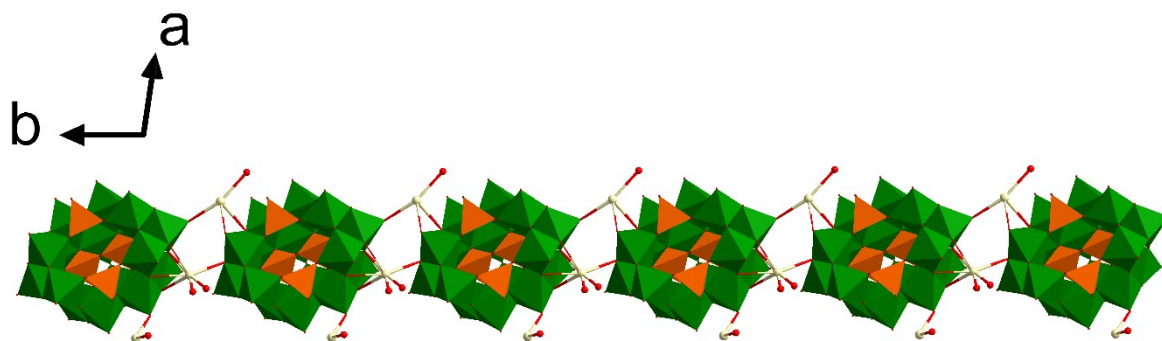

**Fig. S7** View of a one-dimensional linear chain in  $\{\text{Ge}_4\text{Nb}_{16}\}$  running along the  $b$ -axis.



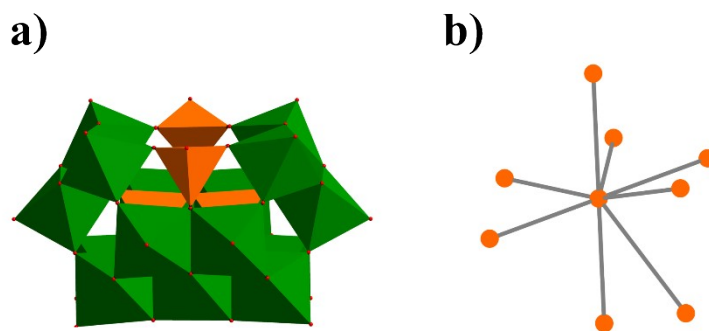

**Fig. S8** (a) View of the  $\{\text{Ge}_4(\text{OH})_2\text{Nb}_{16}\text{O}_{54}\}$  cluster linking eight adjacent  $\{\text{Ge}_4(\text{OH})_2\text{Nb}_{16}\text{O}_{54}\}$  clusters *via*  $\text{Na}^+$ , five  $\text{H}_2\text{en}$  cations ; (b) simplified uninodal 8-connected node in  $\{\text{Ge}_4\text{Nb}_{16}\}$ . Color code:  $\text{NbO}_6$  octahedron, green;  $\text{GeO}_4$  tetrahedron, orange.

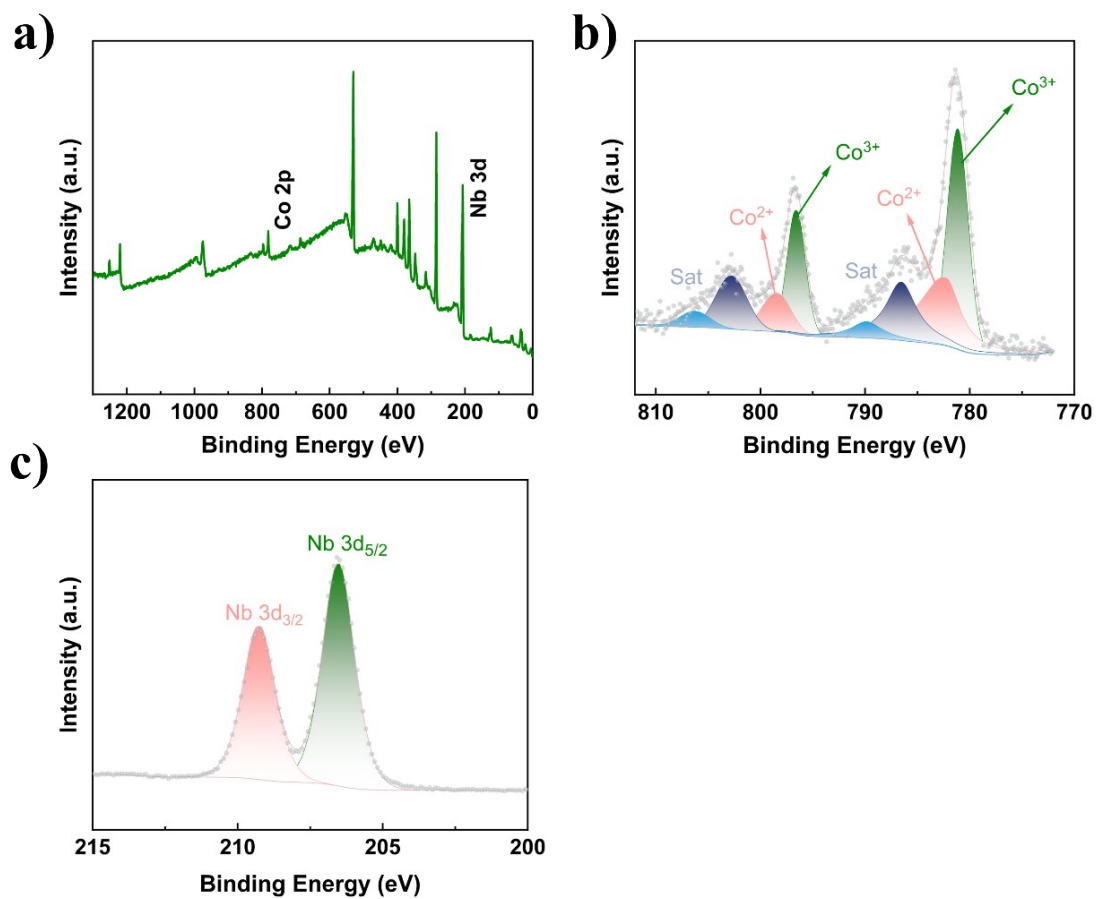

**Fig. S9** XPS spectra of  $\{\text{Co}_9(\text{Ge}_4\text{Nb}_{16})_2\}$ . a) survey spectrum; b) XPS spectrum of Co 2p; c) XPS spectrum of Nb 3d.

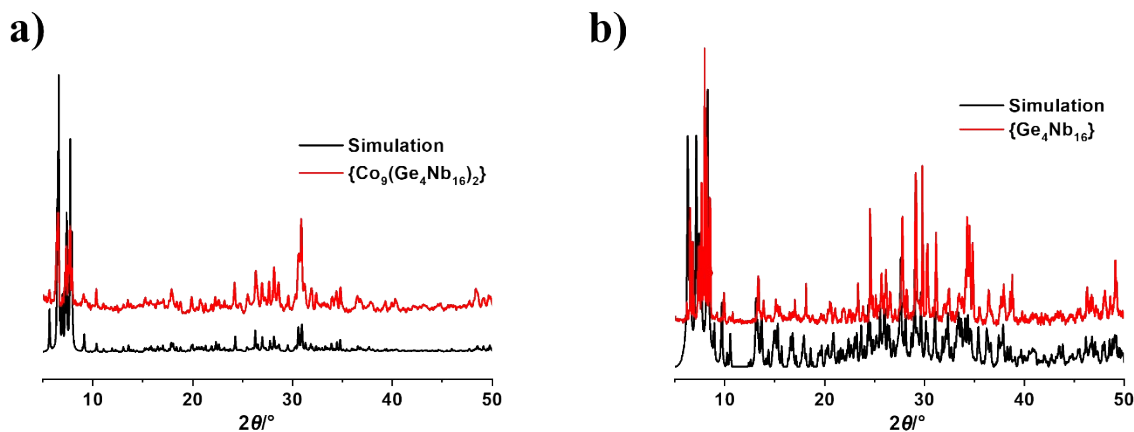

**Fig. S10** The simulated and experimental PXRD patterns of  $\{\text{Co}_9(\text{Ge}_4\text{Nb}_{16})_2\}$  (a) and  $\{\text{Ge}_4\text{Nb}_{16}\}$  (b).

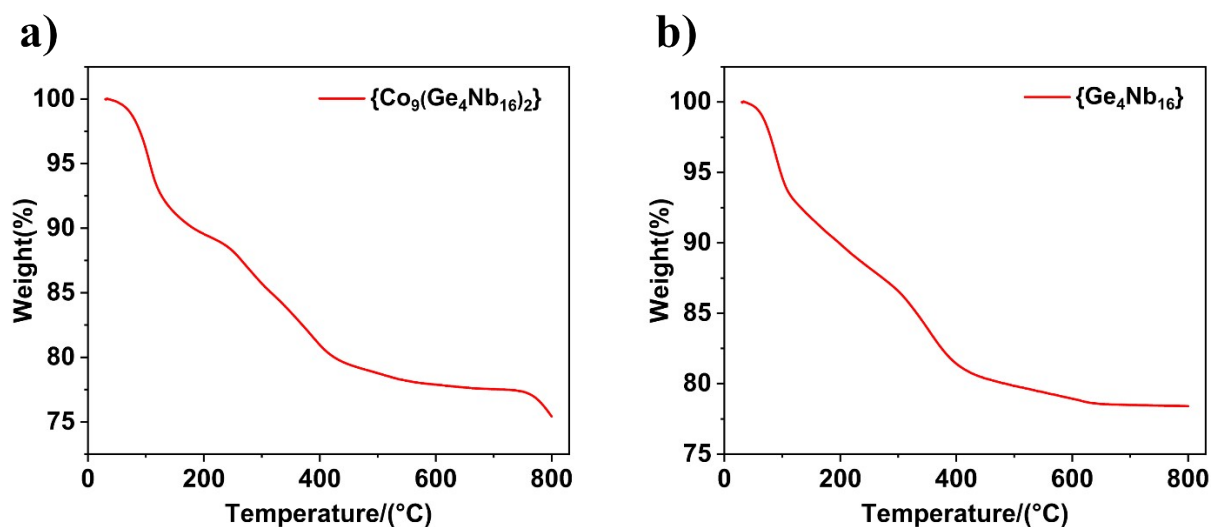

**Fig. S11** TG curves of  $\{\text{Co}_9(\text{Ge}_4\text{Nb}_{16})_2\}$  (a) and  $\{\text{Ge}_4\text{Nb}_{16}\}$  (b).

Thermogravimetric analysis (TGA) of  $\{\text{Co}_9(\text{Ge}_4\text{Nb}_{16})_2\}$  and  $\{\text{Ge}_4\text{Nb}_{16}\}$  was performed from 30 to 800 °C at 10 °C/min under an argon atmosphere. As shown in Figure S11a, for  $\{\text{Co}_9(\text{Ge}_4\text{Nb}_{16})_2\}$ , the first weight loss of 7.28% between 30 and 125 °C, corresponds to the loss of 32 lattice water molecules (calc. 7.30%). The second weight loss of 15.24% is observed from 125 to 700 °C, which is attributed to the removal of 20 coordinated ethylenediamine molecules (calc. 15.21%). For  $\{\text{Ge}_4\text{Nb}_{16}\}$  (Fig. S11b), the initial weight-loss of 7.48% from 25 to 110 °C is primarily ascribed to the release of 15 free water molecules (calc. 7.65%). Subsequently, the second weight loss of 14.04% from 110 °C to 700 °C corresponds to the removal of 5 ethylenediamine molecules and the 10 coordinated water molecules (calc. 13.61%).

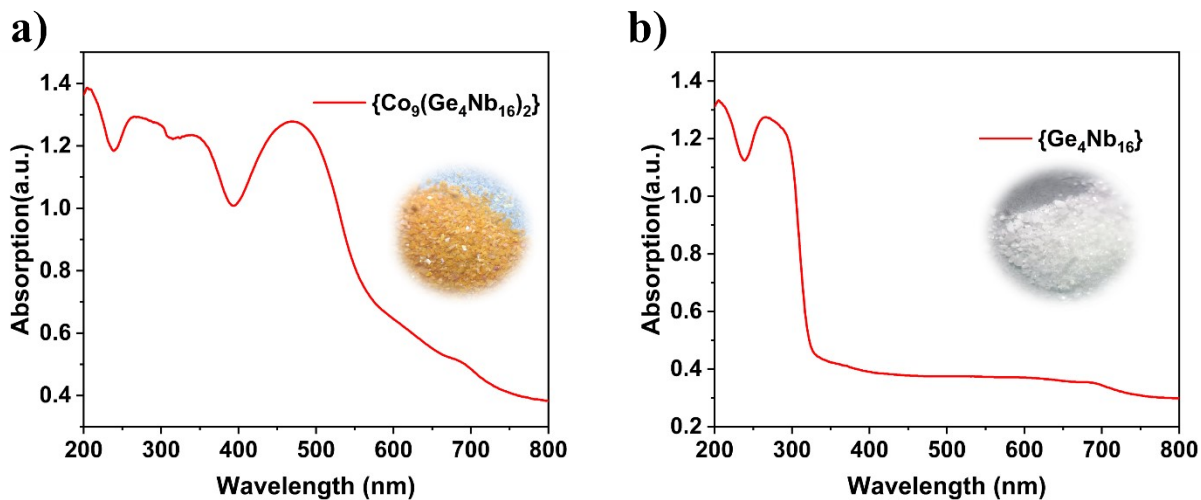

**Fig. S12** UV-Vis absorption spectra of  $\{\text{Co}_9(\text{Ge}_4\text{Nb}_{16})_2\}$  (a) and  $\{\text{Ge}_4\text{Nb}_{16}\}$  (b).

Ultraviolet-visible (UV-vis) spectra of  $\{\text{Co}_9(\text{Ge}_4\text{Nb}_{16})_2\}$  and  $\{\text{Ge}_4\text{Nb}_{16}\}$  were shown in Fig. S12a, 12b, respectively. The absorption peaks in the range of 200–300 nm are attributed to the oxygen-metal (O→Nb) charge-transfer transition (OMCT). Furthermore, as shown in Fig. S12a, for  $\{\text{Co}_9(\text{Ge}_4\text{Nb}_{16})_2\}$ , the wide absorption peaks in the 300–700 nm region can be attributed to the d–d transition of the cobalt ions.

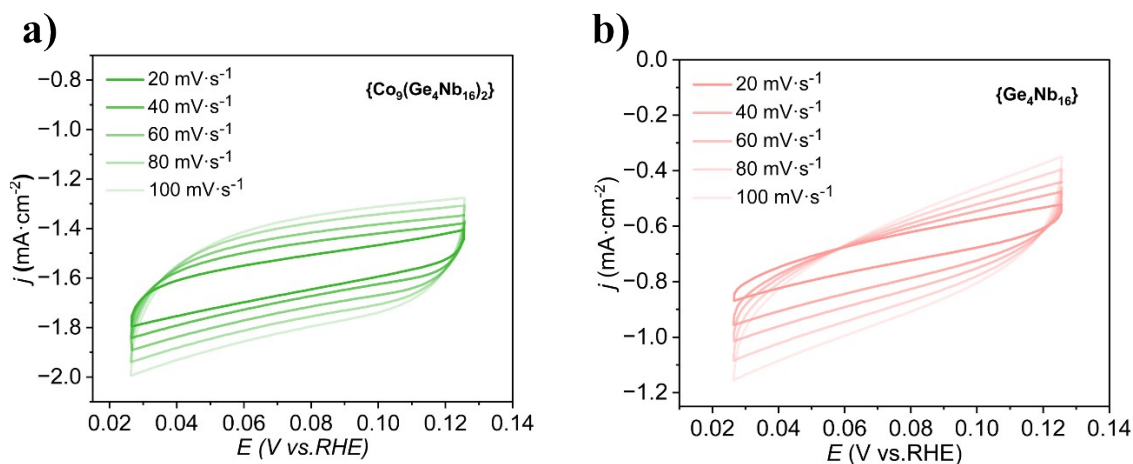

**Fig. S13** Double-layer capacitance measurement. CV cycles of  $\{\text{Co}_9(\text{Ge}_4\text{Nb}_{16})_2\}$  (a) and  $\{\text{Ge}_4\text{Nb}_{16}\}$  (b) at different scanning rates from 20 to 100 mV s<sup>-1</sup>.

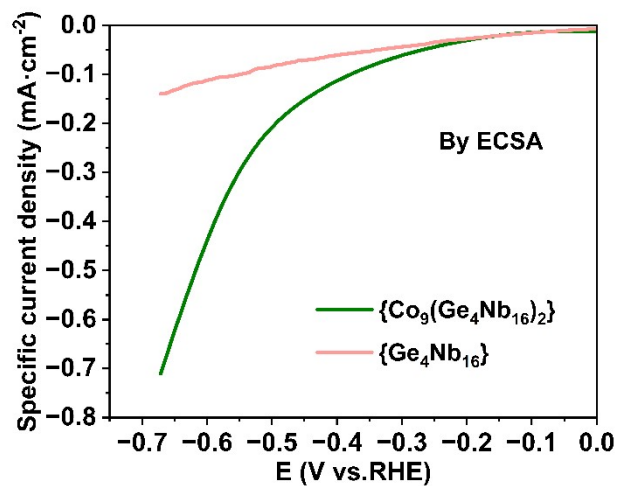

Fig. S14 LSV curves of  $\{\text{Co}_9(\text{Ge}_4\text{Nb}_{16})_2\}$  and  $\{\text{Ge}_4\text{Nb}_{16}\}$  normalized by ECSA.

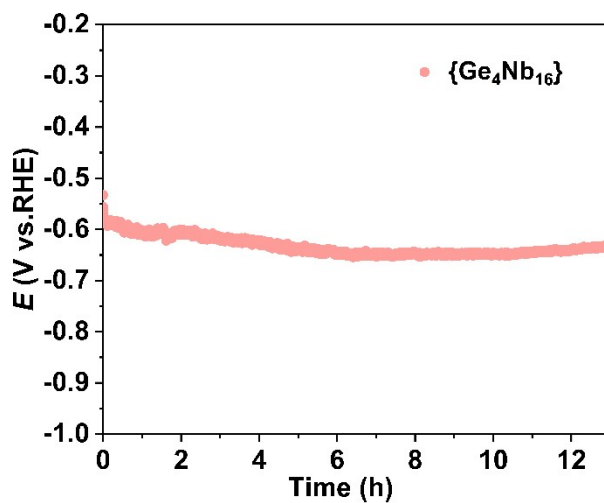

Fig. S15 HER stability of  $\{\text{Ge}_4\text{Nb}_{16}\}$ .

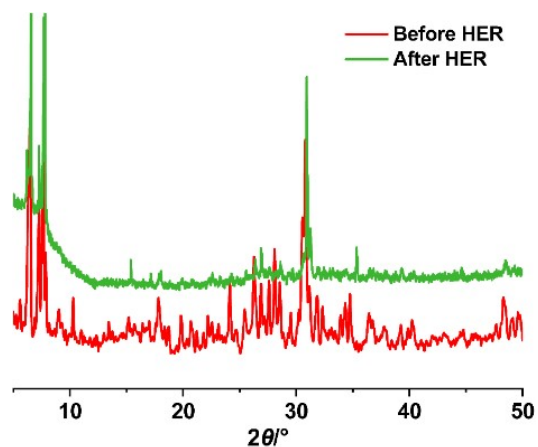

Fig. S16 Powder XRD patterns of  $\{\text{Co}_9(\text{Ge}_4\text{Nb}_{16})_2\}$  before and after 24 hours HER.

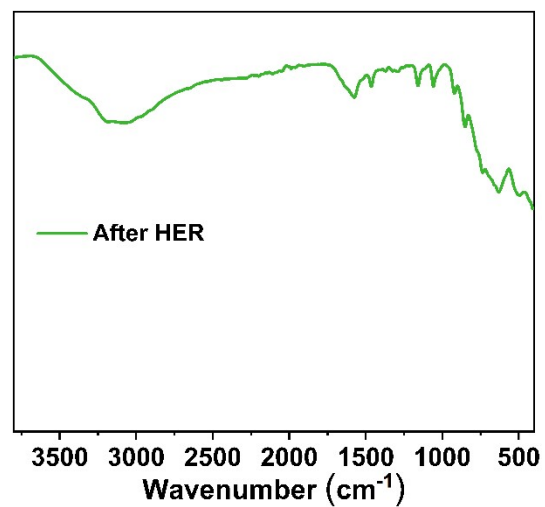

Fig. S17 FTIR patterns of  $\{\text{Co}_9(\text{Ge}_4\text{Nb}_{16})_2\}$  after 24 hours HER.

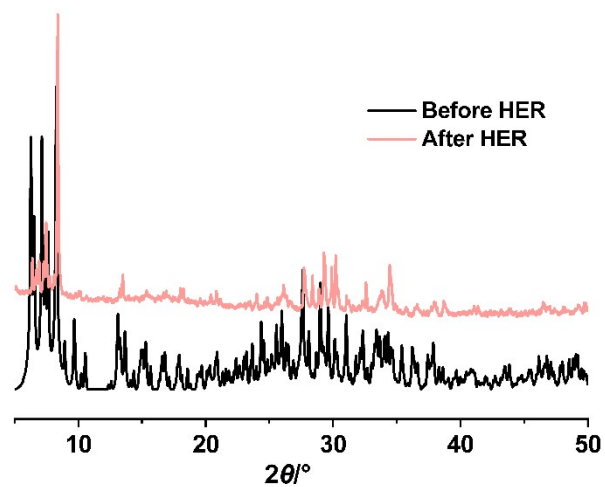

Fig. S18 Powder XRD patterns of  $\{\text{Ge}_4\text{Nb}_{16}\}$  before and after 12 hours HER.

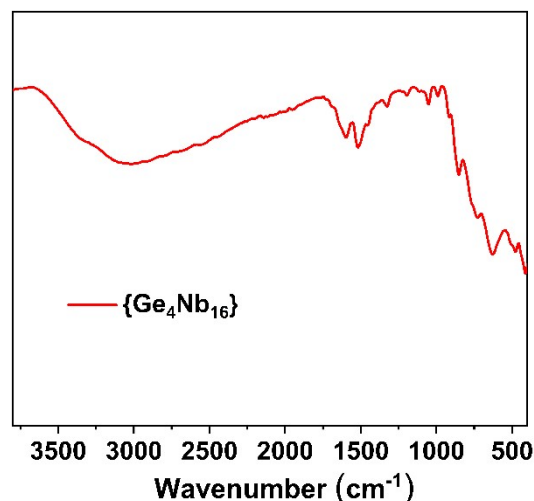

Fig. S19 FTIR patterns of  $\{\text{Ge}_4\text{Nb}_{16}\}$  after 12 hours HER.

#### Section 4 References:

1. L. Zhao, S. Liu, L. Wei, H. He, B. Jiang, Z. Zhan, J. Wang, X. Li and W. Gou, *Catal. Lett.*, 2024, **154**, 5294-5302.
2. H. Jia, Y. Yao, Y. Gao, D. Lu and P. Du, *Chem. Commun.*, 2016, **52**, 13483-13486.
3. R.-Z. Sun, J.-X. Chen, S.-L. Huang, W.-T. Weng, H.-P. Wu, P.-W. Cai, Z.-H. Wen and S.-T. Zheng, *CCS Chem.*, 2025, **7**, 1216-1226.
4. Y. Feng, X.-Y. Yu and U. Paik, *Chem. Commun.*, 2016, **52**, 1633-1636.
5. Y. Hao, Y. Xu, W. Liu and X. Sun, *Mater. Horizons*, 2018, **5**, 108-115.
6. J. Bai, Y. Wang, Y. Wang, T. Zhang, G. Dong and D. Geng, *Int. J. Energy Res.*, 2022, **46**, 12476-12484.
7. Y.-Z. Lu, S.-Z. Wei, S.-S. Yang, L.-P. Fu, J.-Q. Tang, Y. Liu and W. Liu, *Tungsten*, 2025, **7**, 511-524.
8. J. Li, Y. Kang, D. Liu, Z. Lei and P. Liu, *ACS Appl. Mater. Interfaces*, 2020, **12**, 5717-5729.
9. J. Sun, G. Li, K. Zheng, Y. He, Z. Guo and C. Xu, *Appl. Surf. Sci.*, 2020, **517**, 146183.
10. Y. Wang, Y. Pan, L. Zhu, H. Yu, B. Duan, R. Wang, Z. Zhang and S. Qiu, *Carbon*, 2019, **146**, 671-679.
11. S. Li, P. Ren, C. Yang, X. Liu, Z. Yin, W. Li, H. Yang, J. Li, X. Wang, Y. Wang, R. Cao, L. Lin, S. Yao, X. Wen and D. Ma, *Sci. Bull.*, 2018, **63**, 1358-1363.
12. C.-X. Chen, S.-L. Duan, X.-Y. Zhang, R.-Z. Sun, P.-W. Cai, C. Sun and S.-T. Zheng, *Dalton Trans.*, 2025, **54**, 3591-3596.
13. C. Zhang, Y. Liu, J. Wang, W. Li, Y. Wang, G. Qin and Z. Lv, *Appl. Surf. Sci.*, 2022, **595**, 153532.
